# Supplementary material
Source: PubMed Central journal article supplement (PMC8021476)
Supplement: NIHMS1671305-supplement-1.pdf [file NIHMS1671305-supplement-1.pdf]

**Supplemental Table A.** Questions from semi-structured interview guide

|                                                                                                                                                    |                                                                                                                                                                                                                                                                                                                                                                                                                                                                                                                                                                                                                                                                                                                                                                                                                                                   |
|----------------------------------------------------------------------------------------------------------------------------------------------------|---------------------------------------------------------------------------------------------------------------------------------------------------------------------------------------------------------------------------------------------------------------------------------------------------------------------------------------------------------------------------------------------------------------------------------------------------------------------------------------------------------------------------------------------------------------------------------------------------------------------------------------------------------------------------------------------------------------------------------------------------------------------------------------------------------------------------------------------------|
| <p><u>A</u>doption:<br/>understand why organizations and staff participate in an intervention</p>                                                  | <p>What are the major barriers and facilitators to meeting mental health needs or family support needs in your clinic?</p> <p>Are there any published guidelines that influence mental health distress practice within your clinic? If so, what are they?</p> <p>In general, how open is your clinic/department to change?</p> <p>Please tell us who will be the key individuals involved with using e-screening on your team. Describe in their individual roles.</p> <p>Who may be natural champions who could emerge as part of the process?</p>                                                                                                                                                                                                                                                                                               |
| <p><u>I</u>mplementation:<br/>understand how the intervention can be delivered consistently and how it needs to be adapted</p>                     | <p>How easy do you think e-screening would be to implement from easy, some difficulty, or very hard? Can you tell us why you think that?</p> <p>How user-friendly is the electronic Distress Thermometer screening? If it is not user friendly, what would make it more user-friendly?</p> <p>To what extent would you say you/your staff have the knowledge and skills you needed to implement e-screening effectively?</p> <p>What additional skills or information would be helpful for implementing e-screening?</p> <p>What additional resources do you think you would need to fully implement e-screening?</p> <p>Please describe any policies, procedures, or practices within your clinic that may help your efforts to incorporate e-screening? What are policies, procedures or practices that would hinder these efforts, if any?</p> |
| <p><u>M</u>aintenance:<br/>understand program sustainability and the reasons why organizations decide to continue or discontinue interventions</p> | <p>How do you expect e-screening to impact patient care?</p> <p>How do you expect e-screening to impact clinic performance?</p> <p>How do you expect e-screening to impact your personal job performance?</p> <p>Compared to other priorities your clinic may have, how important is providing patients with electronic distress screening?</p> <p>How will you fit e-screening into your clinic workflow? How would you rate this in terms of feasibility: high, medium, low? What would facilitate this process?</p> <p>What are policies, procedures or practices that would hinder e-screening efforts, if any? How might you overcome those challenges?</p>                                                                                                                                                                                  |

**Supplemental Table B.** Qualitative coding matrix

| <b>RE-AIM Component</b><br><i>Overarching topics</i><br>Subordinate themes                                       | Psychosocial<br>team I<br>(N=15) | Psychosocial<br>team II<br>(N= 14) | Leukemia/<br>lymphoma<br>team (N= 3) | Survivorship<br>team<br>(N= 3) | Neuro-<br>oncology team<br>(N= 6) | Bone Marrow<br>Transplant<br>team (N= 2) | Solid Tumor<br>team<br>(N= 2) |
|------------------------------------------------------------------------------------------------------------------|----------------------------------|------------------------------------|--------------------------------------|--------------------------------|-----------------------------------|------------------------------------------|-------------------------------|
| <b><u>Adoption</u></b>                                                                                           |                                  |                                    |                                      |                                |                                   |                                          |                               |
| <i>Barriers to meeting patients' mental health needs</i>                                                         | •                                | •                                  | •                                    | •                              | •                                 |                                          | •                             |
| Staffing barriers<br>Family barriers                                                                             | •                                | •                                  | •                                    | •                              | •                                 |                                          | •                             |
| <i>Identifying champions</i>                                                                                     | •                                | •                                  | •                                    | •                              | •                                 | •                                        | •                             |
| Psychosocial staff<br>Front office staff<br>Advanced Practice Providers<br>Nurses                                | •                                | •<br>•                             | •<br>•                               | •<br>•                         |                                   | •                                        | •                             |
| <b><u>Implementation</u></b>                                                                                     |                                  |                                    |                                      |                                |                                   |                                          |                               |
| <i>Suggestions for e-screening</i>                                                                               | •                                | •                                  | •                                    | •                              | •                                 | •                                        | •                             |
| Administration<br>considerations<br>Changes to the Distress<br>Thermometer<br>Documentation and<br>communication | •<br>•                           | •<br>•                             | •<br>•                               | •<br>•                         | •<br>•                            | •                                        | •<br>•                        |
| <i>Barriers to e-screening</i>                                                                                   | •                                | •                                  |                                      | •                              | •                                 | •                                        |                               |
| Logistical concerns<br>Equipment and technology                                                                  | •                                | •<br>•                             |                                      | •                              | •                                 | •                                        |                               |
| <b><u>Maintenance</u></b>                                                                                        |                                  |                                    |                                      |                                |                                   |                                          |                               |
| <i>Impact of e-Screening</i>                                                                                     | •                                | •                                  | •                                    | •                              | •                                 | •                                        | •                             |
| <i>Patient care</i>                                                                                              | •                                | •                                  | •                                    | •                              | •                                 | •                                        | •                             |
| <i>Job performance</i>                                                                                           | •                                | •                                  | •                                    |                                |                                   | •                                        | •                             |
| <i>Clinic flow</i>                                                                                               | •                                | •                                  | •                                    | •                              | •                                 | •                                        | •                             |

Note. •= coded in transcript for this focus group. EHR= Electronic Health Record.
